# Supplementary material for: No apparent transmission of livestock-associated methicillin-resistant Staphylococcus aureus CC398 in a survey of staff at a regional Danish hospital
Source: Springer Nature journal article supplement (doi:10.1186/s13756-017-0284-y), 2017-12-01
Supplement: MOESM1 [file 15305014]

1 **ADDITIONAL FILE 1**

2 Concentration of airborne bacteria in different areas at the hospital sampled using different active  
 3 samplers<sup>a</sup>.

| Sampling area                         | Concentration on SA (CFU/m <sup>3</sup> )<br>Av (range) | Concentration on NA (CFU/m <sup>3</sup> )<br>Av (range) | n <sup>a</sup>                             | Staphylococcus species                                                                                                                                                         | Other species                                                                                                                                                                                                                                                                                                                     | Number of employees/visitors <sup>b</sup> |
|---------------------------------------|---------------------------------------------------------|---------------------------------------------------------|--------------------------------------------|--------------------------------------------------------------------------------------------------------------------------------------------------------------------------------|-----------------------------------------------------------------------------------------------------------------------------------------------------------------------------------------------------------------------------------------------------------------------------------------------------------------------------------|-------------------------------------------|
| Locker room for female employees      | 61 (BD-113)                                             | 188 (137-239)                                           | 3                                          | -                                                                                                                                                                              | <i>Micrococcus luteus</i>                                                                                                                                                                                                                                                                                                         | <5/none                                   |
|                                       | 69 (BD-264)                                             | 469 (BD-1399)                                           | 6                                          | <i>S. caprae</i><br><i>S. epidermidis</i>                                                                                                                                      | <i>Micrococcus luteus</i>                                                                                                                                                                                                                                                                                                         | None/none                                 |
|                                       | 222 (BD-438)                                            | 1061 (BD-2564)                                          | 3                                          | <i>S. epidermidis</i><br><i>S. hominis</i><br><i>S. pettenkoferi</i>                                                                                                           | <i>Kytococcus sedentarius</i>                                                                                                                                                                                                                                                                                                     | <10/none                                  |
| Patient reception/waiting room        | 17 (BD-21)                                              | 550 (BD-1299)                                           | 4                                          | -                                                                                                                                                                              | <i>Bacillus infantis</i>                                                                                                                                                                                                                                                                                                          | <10/none                                  |
|                                       | 25 (BD-44)                                              | 171 (125-218)                                           | 2                                          | -                                                                                                                                                                              | <i>Micrococcus luteus</i>                                                                                                                                                                                                                                                                                                         | <5/<5<br>One patient with known MRSA      |
|                                       | 26 (BD-44)                                              | BD                                                      | 2                                          | -                                                                                                                                                                              | <i>Micrococcus luteus</i>                                                                                                                                                                                                                                                                                                         | None/none                                 |
|                                       | 9 (BD-22)                                               | BD                                                      | 2                                          | <i>S. epidermidis</i>                                                                                                                                                          | <i>Bacillus sp.</i>                                                                                                                                                                                                                                                                                                               | None/none                                 |
|                                       | 444 (343-545)                                           | 308 (BD-533)                                            | 2                                          | -                                                                                                                                                                              | <i>Corynebacterium stationis</i><br><i>Micrococcus luteus</i>                                                                                                                                                                                                                                                                     | <5/<10                                    |
|                                       | 379 (164-595)                                           | 371 (BD-742)                                            | 4                                          | -                                                                                                                                                                              | <i>Bacillus licheniformis</i><br><i>Micrococcus luteus</i><br><i>Microbacterium testaceum</i>                                                                                                                                                                                                                                     | <5/<10                                    |
|                                       | 30 (BD-50)                                              | 124 (BD-166)                                            | 2                                          | <i>S. epidermidis</i>                                                                                                                                                          | <i>Micrococcus luteus</i>                                                                                                                                                                                                                                                                                                         | <5/<10                                    |
|                                       | BD                                                      | 147 (BD-297)                                            | 4                                          | <i>S. epidermidis</i>                                                                                                                                                          |                                                                                                                                                                                                                                                                                                                                   | <5/<5                                     |
| 110 (BD-210)                          | 131 (BD-179)                                            | 2                                                       | <i>S. epidermidis</i><br><i>S. hominis</i> | <i>Micrococcus luteus</i>                                                                                                                                                      | <5/<5                                                                                                                                                                                                                                                                                                                             |                                           |
| Bed washes                            | 78 (BD-285)                                             | 159 (BD-416)                                            | 6                                          | <i>S. hominis</i>                                                                                                                                                              | -                                                                                                                                                                                                                                                                                                                                 | <5/none                                   |
| Cellar with bed and laundry transport | BD                                                      | 66 (BD-107)                                             | 3                                          | -                                                                                                                                                                              | <i>Arthrobacter sp.</i><br><i>Bacillus licheniformis</i>                                                                                                                                                                                                                                                                          | <5/<5                                     |
| Main entrance                         | Ns                                                      | 339                                                     | 1                                          | <i>S. epidermidis</i>                                                                                                                                                          | <i>Kytococcus sedentarius</i>                                                                                                                                                                                                                                                                                                     | >20 people                                |
| Lunchroom for employees               | Ns                                                      | 643                                                     | 1                                          | <i>S. epidermidis</i><br><i>S. cohnii</i><br><i>S. hominis</i><br><i>S. hyicus</i><br><i>S. pasteurii</i><br><i>S. pettenkoferi</i><br><i>S. simulans</i><br><i>S. warneri</i> | <i>Bacillus licheniformis</i><br><i>Bacillus altitudinis</i><br><i>Bacillus pumilus</i><br><i>Kocuria marina</i><br><i>Kocuria rosea</i><br><i>Kytococcus sedentarius</i><br><i>Microbacterium sp</i><br><i>Micrococcus luteus</i><br><i>Moraxella osloensis</i><br><i>Pseudomonas stutzeri</i><br><i>Solibacillus silvestris</i> | >20/none                                  |
| Lunch desk for visitors               | Ns                                                      | 714                                                     | 1                                          | -                                                                                                                                                                              | <i>Bacillus pumilus</i><br><i>Kytococcus sedentarius</i><br><i>Microbacterium sp.</i>                                                                                                                                                                                                                                             | <10 people                                |
| Average, Median                       | 106, 46                                                 | 329, 188                                                | -                                          | -                                                                                                                                                                              | -                                                                                                                                                                                                                                                                                                                                 |                                           |
| Outdoor reference                     | 26 (BD-44)                                              | BD                                                      | 2                                          | -                                                                                                                                                                              | -                                                                                                                                                                                                                                                                                                                                 | <10 people                                |

4 <sup>a</sup>n= number of samples, samples were taken using GSP-sampler, IOM-sampler, BioSampler and ACI-  
 5 6-stage sampler; <sup>b</sup>number of people present in the sampling area in addition to the occupational  
 6 hygienist was categorized as: none, less than 5, less than 10, and more than 20. The number of visitors

7 including patients; SA= SaSelect agar plates; NA=nutrient agar plates; BD=below detection level;

8 ns=not studied.
