# Supplementary material for: No apparent transmission of livestock-associated methicillin-resistant Staphylococcus aureus CC398 in a survey of staff at a regional Danish hospital
Source: Springer Nature journal article supplement (doi:10.1186/s13756-017-0284-y), 2017-12-01
Supplement: MOESM2 [file 15305014]

1 **ADDITIONAL FILE 2**

- 2
- 3 Concentration of airborne bacteria in eight different hospital areas,
- 4 sampled passively with Electrostatic Dust Collectors.

| Area                                  | Concentration as measured on SA (CFU/m <sup>2</sup> /day) | <i>Staphylococcus</i> species                                   |
|---------------------------------------|-----------------------------------------------------------|-----------------------------------------------------------------|
| Locker room for female employees      | 68<br>137<br>376                                          | <i>S. hominis</i><br><i>S. epidermidis</i><br><i>S. xylosum</i> |
| Locker room for male employees        | 1299                                                      | <i>S. hominis</i><br><i>S. warneri</i>                          |
| Bed washes                            | 68                                                        | <i>S. epidermidis</i>                                           |
| Cellar with bed and laundry transport | 513                                                       | <i>S. capitis</i><br><i>S. warneri</i>                          |
| Patient reception/waiting area        | 34                                                        | <i>S. epidermidis</i>                                           |
| Consulting room                       | 155                                                       | <i>S. hominis</i><br><i>S. warneri</i>                          |
| Average, Median                       | 331, 146                                                  | -                                                               |

- 5 SA= SaSelect agar plates.
